# Supplementary material
Source: PubMed Central journal article supplement (PMC3104767)
Supplement: JCI46045sd.pdf [file JCI46045sd.pdf]

|                                           | <b>Lean<br/>Controls</b> | <b>Obese</b>   | <b>Obese DM2</b> | <b>Normal<br/>Range</b> |
|-------------------------------------------|--------------------------|----------------|------------------|-------------------------|
| <b>Subjects in Group</b>                  | 6                        | 7              | 11               |                         |
| <b>Age (years)</b>                        | 39.1 ± 9.8               | 36.4 ± 9.8     | 47.0 ± 11.9      |                         |
| <b>Body mass index (kg/m<sup>2</sup>)</b> | 22.6 ± 3.5               | 49.1 ± 6.9 †   | 47.2 ± 7.0 †     | 18.5-29.9               |
| <b>Fasting Glucose (mmol/L)</b>           | 4.6 ± 0.8                | 5.3 ± 0.4      | 7.7 ± 0.4 *      | < 6.1                   |
| <b>Fasting Insulin (pmol/L)</b>           | 62.5 ± 38.8              | 166.7 ± 113.2* | 345.9 ± 235.4*   | 60                      |
| <b>Cholesterol (mmol/L)</b>               | 4.6 ± 0.7                | 5.7 ± 0.3 *    | 4.5 ± 0.9        | 3-5                     |
| <b>Triglycerides (mmol/L)</b>             | 0.7 ± 0.2                | 2.1 ± 0.7      | 1.6 ± 1.0        | 1.1-1.7                 |

**Supplementary Table 1.** Characteristics of study subjects

Mean ± SD; \* p<0.05 , † p<0.005 vs. lean controls. To convert to mg/dL divide:

glucose by 0.0555, cholesterol by 0.0259 and triglycerides by 0.0113. To convert

insulin to mU/L divide by 6.945.

Supplemental Figure 1

A.

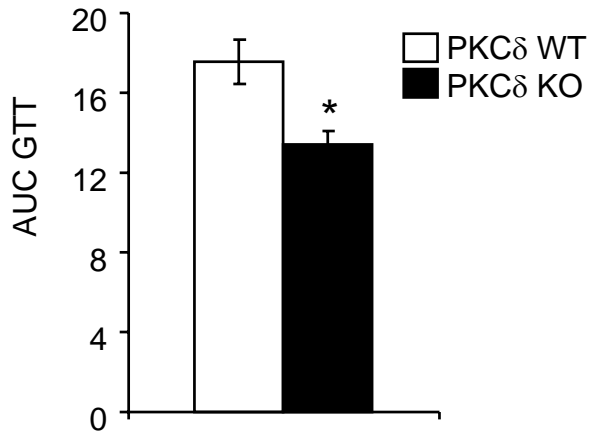

B.

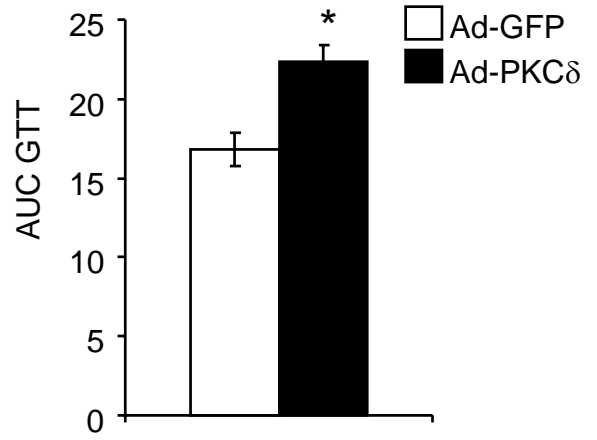

C.

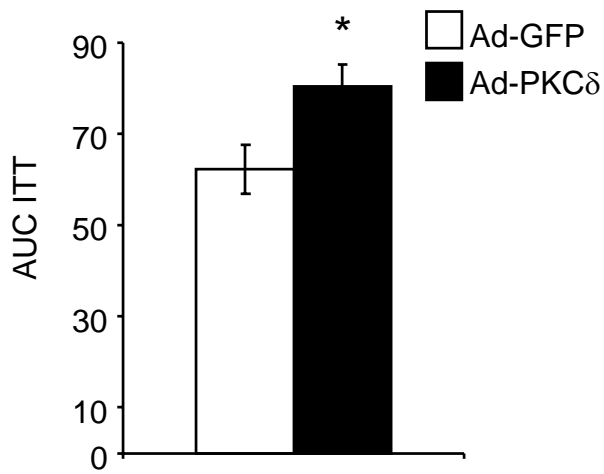

D.

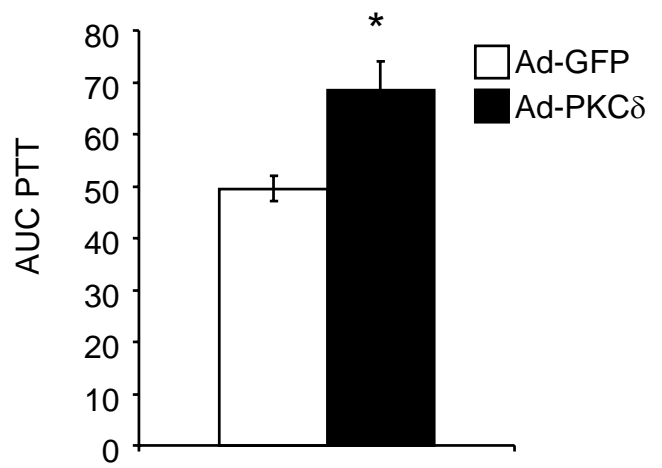

E.

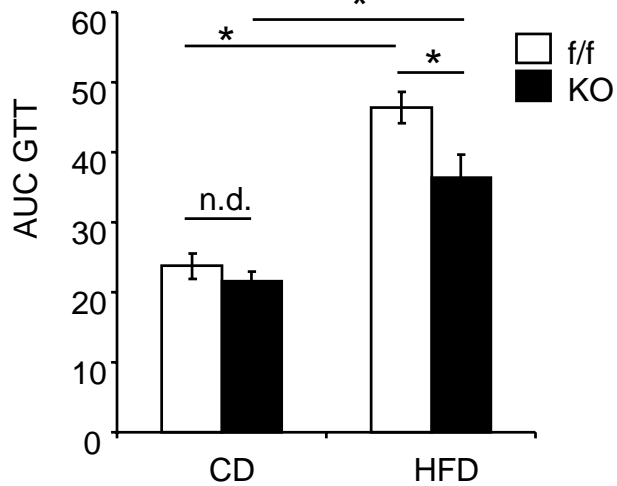

Supplemental Figure 2

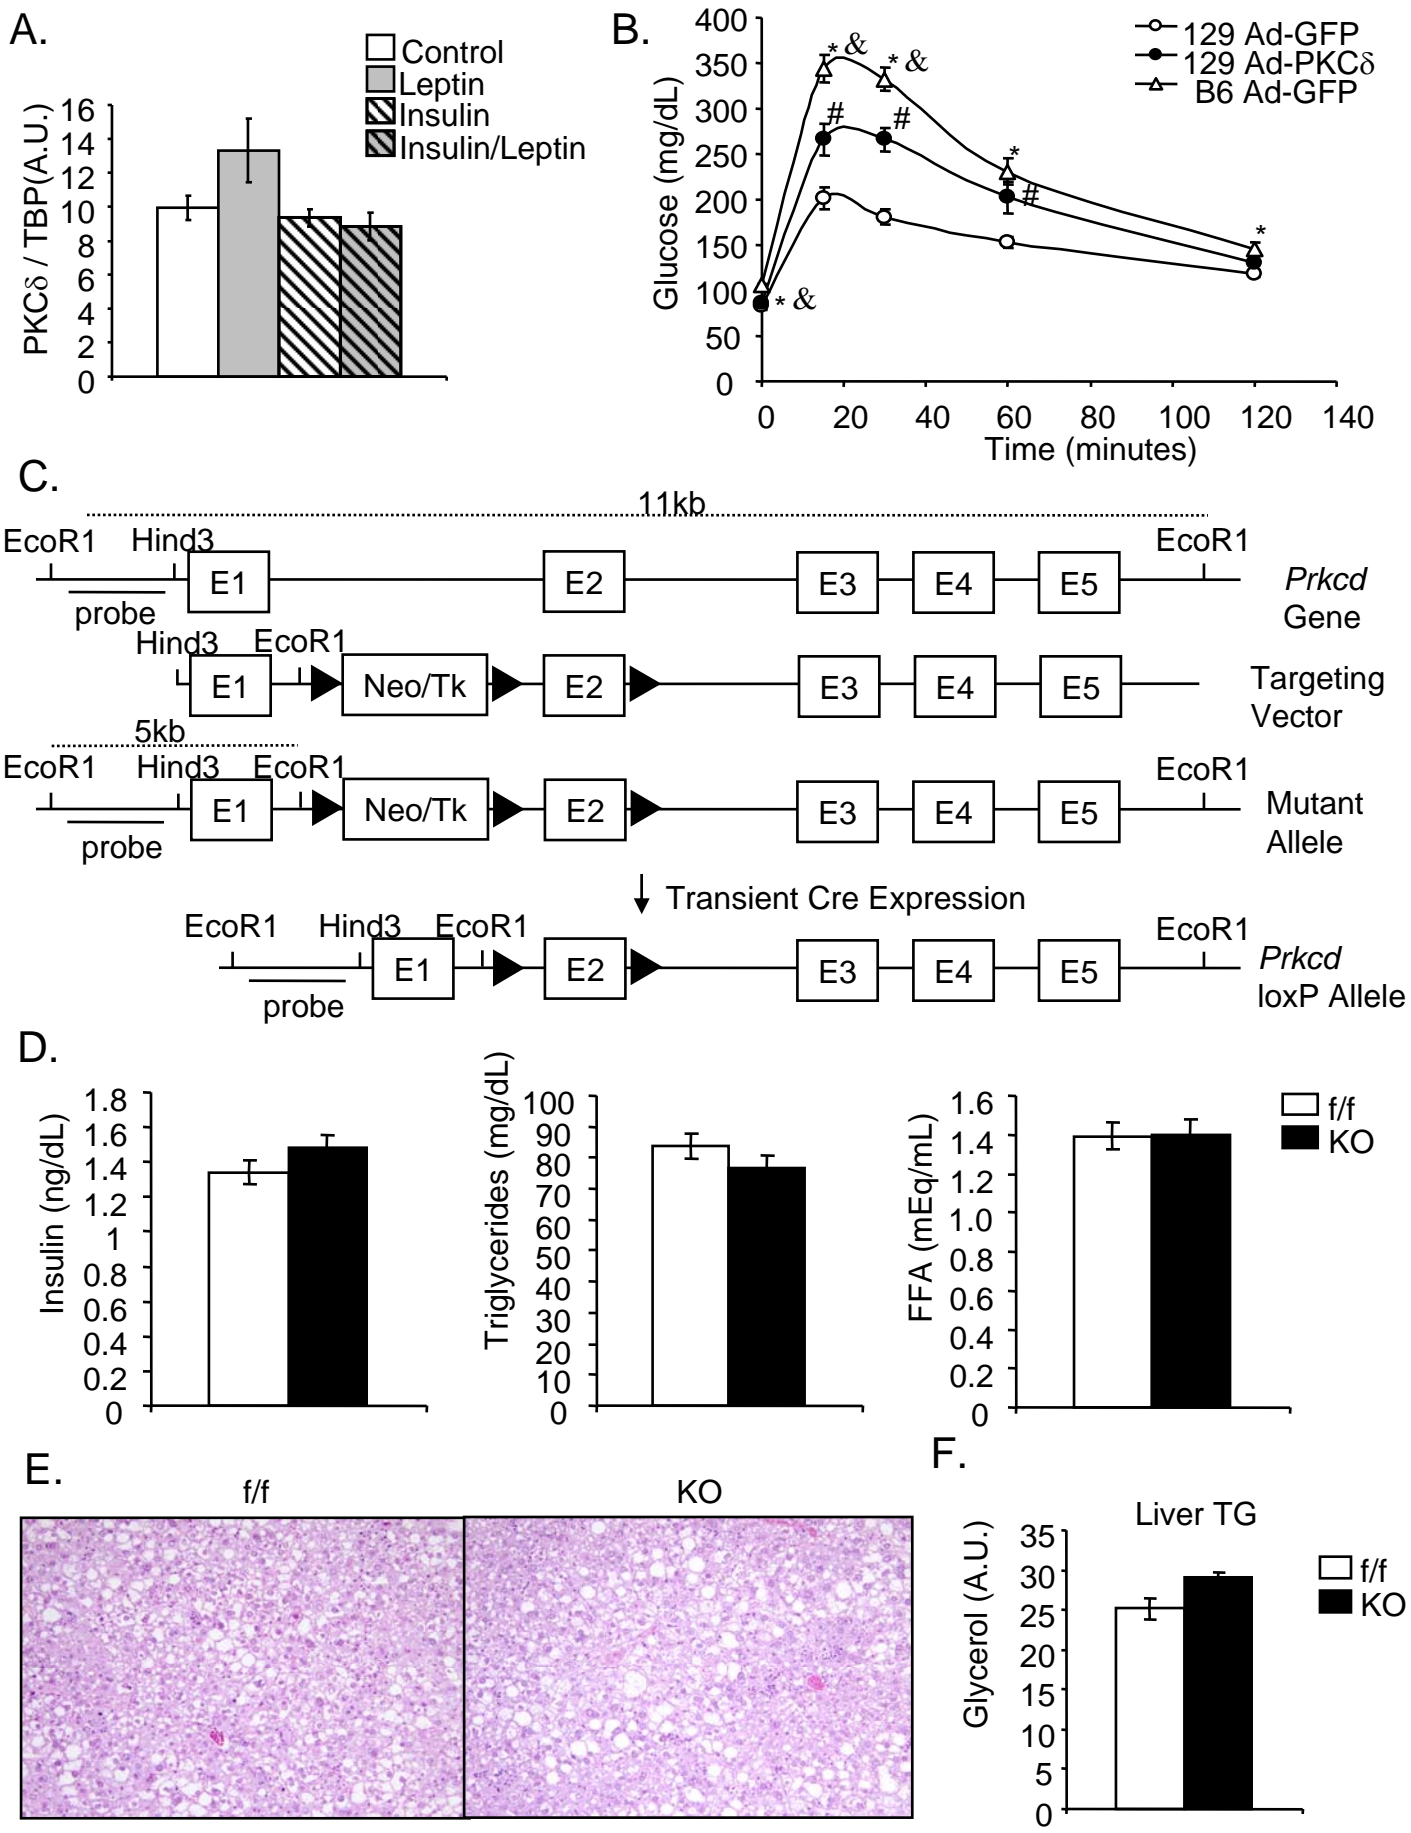

A.

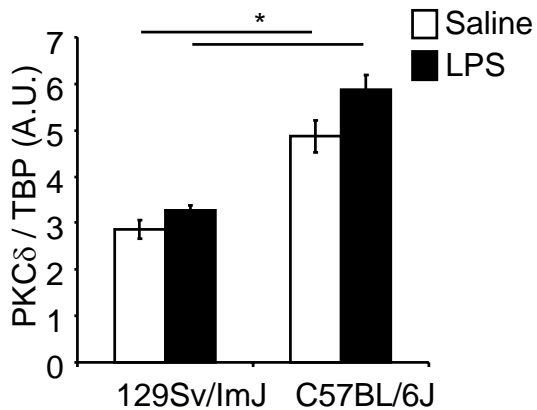

B.

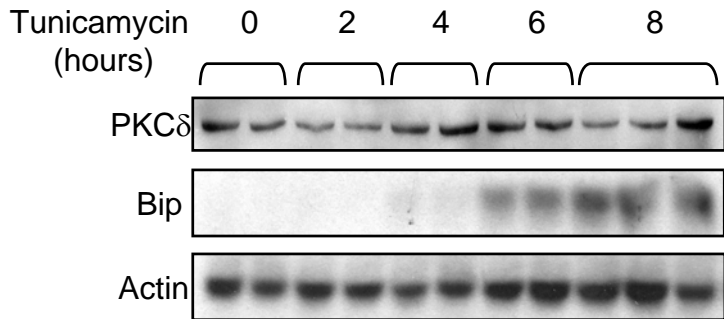

C.

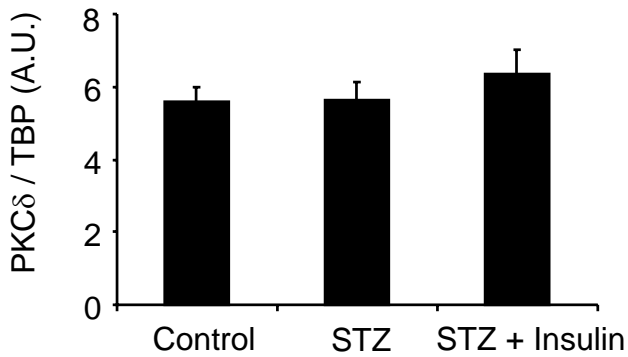

D.

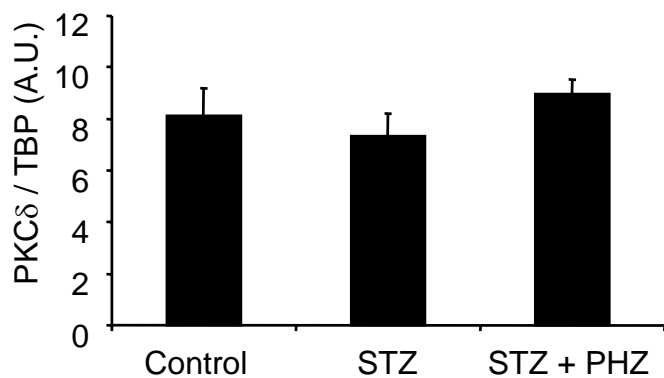

E.

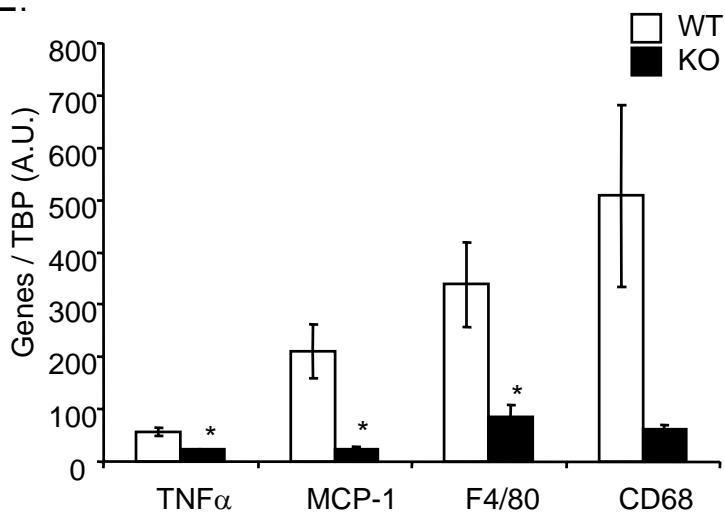

## Supplemental figures legend

### Supplemental Figure 1

**A)** Area under curve for glucose tolerance test of wild type vs. PKC $\delta$  KO mice (n=5 per group, \*: p<0.05). **B)** Glucose tolerance tests (GTT) in mice overexpressing GFP (white bars) or PKC $\delta$  (black bars) in the liver (n=13 per group, \*: p<0.05). **C)** Insulin tolerance tests (ITT) in mice overexpressing GFP (white bars) or PKC $\delta$  (black bars) in the liver (n=9 per group, \*: p<0.05). **D)** Pyruvate tolerance tests (PTT) in mice overexpressing GFP (white bars) or PKC $\delta$  (black bars) in the liver (n=19 per group, \*: p<0.05). **E)** Glucose tolerance test of PKC $\delta$ -floxed mice injected with empty (white bars) or Cre recombinase expressing adenovirus (black bars) following 10 weeks of CD or HFD (n=6 per group, \*: p<0.05).

### Supplemental Figure 2

**A)** Expression of PKC $\delta$  mRNA was measured by qPCR using extracts of liver from leptin and/or insulin treated ob/ob mice (n=6 per group) **B)** Glucose tolerance tests (GTT) in 129 (circles) or B6 mice (triangles) overexpressing GFP (white) or PKC $\delta$  (black) in the liver (n= 4-5 per group). Significance tests between groups were as follows: &: 129AdPKC vs B6AdGFP P<0.01, \*: 129AdGFP vs B6AdGFP P<0.02, #: 129AdGFP vs 129AdPKC P<0.03. **C)** Targeting strategy used to generate PKC $\delta$  conditional knock-out mice. **D)** Serum metabolites from 2 hour fasted PKC $\delta$ -floxed mice injected with empty (white bars) or Cre recombinase expressing adenovirus (black bars) following 10 weeks of HFD (n=6 per group). **E)** Histological pictures of hematoxylin and eosin liver sections

from PKC $\delta$ -floxed mice injected with empty (left panel) or Cre recombinase expressing adenovirus (right panel) following 10 weeks of HFD (n=6 per group). **F)** Hepatic triglyceride content from PKC $\delta$ -floxed mice injected with empty (white bars) or Cre recombinase expressing adenovirus (black bars) following 10 weeks of HFD (n=6 per group).

### **Supplemental Figure 3**

**A)** Expression of PKC $\delta$  mRNA in liver was measured by qPCR for vehicle or LPS-treated C57BL/6J and 129SvEv mice (n=5 per group). **B)** Western-blot analysis of PKC $\delta$ , Bip and actin expression in liver of tunicamycin-treated animals. qPCR analysis of mRNA expression of PKC $\delta$  in **C)** control, streptozotocin and insulin rescued mice (n=13/11/14 per group) and **D)** control, streptozotocin and phlorizin-rescued mice (n=5/6/5 per group). **E)** Expression of inflammatory markers TNF $\alpha$ , MCP1, F4/80 and CD68 mRNA was measured by qPCR in visceral fat depot of WT and PKC $\delta$ KO mice (n=4 per group). All gene expression results are normalized to TBP or 18S.
